# Supplementary material
Source: Royal Society of Chemistry journal article supplement (doi:10.1039/d6nr00361c)
Supplement: d6nr00361c1.pdf [file d6nr00361c1.pdf]

## In-Plane Mechanical Property of Terephthalate-based Two-Dimensional Metal-Organic Frameworks

### Supporting Information

Shengjia Zhang,<sup>a#</sup> Kamal E. S. Nassar,<sup>b#</sup> Ali Azmy,<sup>b</sup> Lukasz Wojtas,<sup>b</sup> Ioannis

Spanopoulos,<sup>b\*</sup> and Qing Tu<sup>a\*</sup>

<sup>a</sup> Department of Material Science and Engineering, Texas A&M University

<sup>b</sup> Department of Chemistry, University of South Florida

# these authors contributed equally

\* corresponding authors: [spanopoulos@usf.edu](mailto:spanopoulos@usf.edu); [qing.tu@tamu.edu](mailto:qing.tu@tamu.edu).

### Section I – Materials Synthesis and Characterization

All starting materials for synthesis were purchased commercially and were used without further purification. Zinc Nitrate Hexahydrate 98% and Manganese(II) Nitrate tetrahydrate were purchased from Sigma Aldrich. Terephthalic acid >99% was purchased from Tokyo Chemical Industry. Nitric Acid ACS reagent, Absolute Ethanol, and N,N Dimethyl Formamide were purchased from Thermo Fisher.

Powder X-ray diffraction patterns were measured using a Bruker D8 Advance Diffractometer with Lynxeye detector using CuK $\alpha$  radiation. X-ray source operated at 40kV/40mA and Ni filter was used to suppress Beta radiation. 2.5 deg primary and secondary Soller slits were used to suppress axial divergence. Diffraction patterns were recorded from 2 to 60 2 $\theta$  in variable slits mode and with a knife edge installed. A typical scan rate was 1 sec/step with a step size of 0.02 deg.

Single-crystal X-ray diffraction data were collected on a Bruker D8 Venture diffractometer equipped with a PHOTON III CMOS detector and a Cu K $\alpha$  INCOATEC ImuS micro-focus source ( $\lambda = 1.54178 \text{ \AA}$ ). Data collection and processing were carried out using standard procedures. The crystal structures were solved and refined using full-matrix least-squares methods on F<sup>2</sup>. The crystallographic data and refinement details of (DMA)<sub>2</sub>[Zn<sub>3</sub>(BDC)<sub>4</sub>·1.5H<sub>2</sub>O] (BDC = 1,4-benzenedicarboxylate, DMA = dimethylammonium) and Zn<sub>3</sub>(BDC)<sub>3</sub>(H<sub>2</sub>O)<sub>2</sub>·4(DMF) (DMF = N,N-Dimethylformamide) are summarized in in **Table S1** and **Table S5** and geometrical parameters in **Tables S2-S4** and **Tables S6-S9**.

**Table S1. Crystal data and structure refinement of (DMA)<sub>2</sub>[Zn<sub>3</sub>(BDC)<sub>4</sub>·1.5H<sub>2</sub>O] at 298 K.**

| Item                                                        | Value                                                                            |
|-------------------------------------------------------------|----------------------------------------------------------------------------------|
| Identification code                                         | (DMA) <sub>2</sub> [Zn <sub>3</sub> (BDC) <sub>4</sub> ·1.5H <sub>2</sub> O]     |
| Empirical formula                                           | C <sub>36</sub> H <sub>32</sub> N <sub>2</sub> O <sub>17.5</sub> Zn <sub>3</sub> |
| Formula weight                                              | 968.74                                                                           |
| Temperature / K                                             | 298                                                                              |
| Crystal system                                              | Monoclinic                                                                       |
| Space group                                                 | <i>C2/c</i>                                                                      |
| <i>a</i> / Å                                                | 33.243(2)                                                                        |
| <i>b</i> / Å                                                | 9.7417(7)                                                                        |
| <i>c</i> / Å                                                | 18.2880(10)                                                                      |
| $\alpha$ / °                                                | 90                                                                               |
| $\beta$ / °                                                 | 93.412(3)                                                                        |
| $\gamma$ / °                                                | 90                                                                               |
| Volume / Å <sup>3</sup>                                     | 5911.9(6)                                                                        |
| <i>Z</i>                                                    | 4                                                                                |
| $\rho_{\text{calc}}$ / g·cm <sup>-3</sup>                   | 1.088                                                                            |
| $\mu$ / mm <sup>-1</sup>                                    | 1.880                                                                            |
| F(000)                                                      | 1968                                                                             |
| Crystal size / mm <sup>3</sup>                              | 0.11 × 0.095 × 0.07                                                              |
| Radiation                                                   | Cu K $\alpha$ ( $\lambda$ = 1.54178 Å)                                           |
| 2 $\theta$ range for data collection / °                    | 5.326–158.57                                                                     |
| Index ranges                                                | -42 ≤ <i>h</i> ≤ 42, -12 ≤ <i>k</i> ≤ 12, -22 ≤ <i>l</i> ≤ 23                    |
| Reflections collected                                       | 86762                                                                            |
| Independent reflections                                     | 6369 (R <sub>int</sub> = 0.0510, R $\sigma$ = 0.0251)                            |
| Data / restraints / parameters                              | 6369 / 96 / 324                                                                  |
| Goodness-of-fit on F <sup>2</sup>                           | 1.115                                                                            |
| Final R indices [ <i>I</i> > 2 $\sigma$ ( <i>I</i> )]       | R1 = 0.0577, wR2 = 0.1845                                                        |
| Final R indices [all data]                                  | R1 = 0.0607, wR2 = 0.1884                                                        |
| Largest diff. peak / hole / e <sup>-</sup> ·Å <sup>-3</sup> | 0.80 / -0.50                                                                     |

**Table S2. Bond lengths [Å] for (DMA)<sub>2</sub>[Zn<sub>3</sub>(BDC)<sub>4</sub>·1.5H<sub>2</sub>O] at 298 K.**

| Atom  | Atom               | Length/Å | Atom  | Atom               | Length/Å  |
|-------|--------------------|----------|-------|--------------------|-----------|
| Zn1_1 | O3_1               | 1.965(2) | C6_1  | C11_1              | 1.384(5)  |
| Zn1_1 | O14_1 <sup>1</sup> | 1.976(2) | C7_1  | C8_1               | 1.375(5)  |
| Zn1_1 | O15_1              | 1.947(3) | C8_1  | C9_1               | 1.386(5)  |
| Zn1_1 | O21_1              | 1.985(2) | C9_1  | C10_1              | 1.384(4)  |
| Zn2_1 | O5_1 <sup>2</sup>  | 2.047(2) | C9_1  | C13_1              | 1.502(4)  |
| Zn2_1 | O5_1 <sup>3</sup>  | 2.047(2) | C10_1 | C11_1              | 1.378(5)  |
| Zn2_1 | O12_1 <sup>4</sup> | 2.037(2) | C16_1 | C18_1              | 1.511(5)  |
| Zn2_1 | O12_1              | 2.037(2) | C18_1 | C19_1              | 1.367(8)  |
| Zn2_1 | O21_1 <sup>3</sup> | 2.244(2) | C18_1 | C20_1 <sup>5</sup> | 1.358(8)  |
| Zn2_1 | O21_1 <sup>2</sup> | 2.244(2) | C19_1 | C20_1              | 1.377(7)  |
| O3_1  | C4_1               | 1.263(4) | C22_1 | C24_1              | 1.495(4)  |
| O5_1  | C4_1               | 1.243(4) | C24_1 | C25_1              | 1.386(5)  |
| O12_1 | C13_1              | 1.237(4) | C24_1 | C26_1 <sup>6</sup> | 1.403(5)  |
| O14_1 | C13_1              | 1.257(4) | C25_1 | C26_1              | 1.385(5)  |
| O15_1 | C16_1              | 1.241(6) | N1_2  | C2_2               | 1.469(12) |
| O17_1 | C16_1              | 1.229(6) | N1_2  | C3_2               | 1.467(13) |
| O21_1 | C22_1              | 1.305(4) | N1_3  | C2_3               | 1.49(2)   |
| O23_1 | C22_1              | 1.215(5) | N1_3  | C3_3               | 1.45(2)   |
| C4_1  | C6_1               | 1.501(4) | N1_4  | C2_4               | 1.47(2)   |
| C6_1  | C7_1               | 1.383(4) | N1_4  | C3_4               | 1.49(2)   |

<sup>1</sup>+X,2-Y,1/2+Z; <sup>2</sup>+X,2-Y,-1/2+Z; <sup>3</sup>3/2-X,1/2+Y,3/2-Z; <sup>4</sup>3/2-X,5/2-Y,1-Z; <sup>5</sup>1-X,1-Y,2-Z; <sup>6</sup>3/2-X,1/2-Y,2-Z

**Table S3. Bond Angles [°] for (DMA)<sub>2</sub>[Zn<sub>3</sub>(BDC)<sub>4</sub>·1.5H<sub>2</sub>O] at 298 K.**

| Atom               | Atom  | Atom               | Angle/°    | Atom               | Atom  | Atom               | Angle/°   |
|--------------------|-------|--------------------|------------|--------------------|-------|--------------------|-----------|
| O3_1               | Zn1_1 | O14_1 <sup>1</sup> | 108.94(13) | C7_1               | C6_1  | C4_1               | 120.7(3)  |
| O3_1               | Zn1_1 | O21_1              | 110.33(10) | C7_1               | C6_1  | C11_1              | 118.9(3)  |
| O14_1 <sup>1</sup> | Zn1_1 | O21_1              | 99.78(11)  | C11_1              | C6_1  | C4_1               | 120.4(3)  |
| O15_1              | Zn1_1 | O3_1               | 97.75(13)  | C8_1               | C7_1  | C6_1               | 121.0(3)  |
| O15_1              | Zn1_1 | O14_1 <sup>1</sup> | 106.08(13) | C7_1               | C8_1  | C9_1               | 119.9(3)  |
| O15_1              | Zn1_1 | O21_1              | 132.78(13) | C8_1               | C9_1  | C13_1              | 119.7(3)  |
| O5_1 <sup>2</sup>  | Zn2_1 | O5_1 <sup>3</sup>  | 180.0      | C10_1              | C9_1  | C8_1               | 119.3(3)  |
| O5_1 <sup>2</sup>  | Zn2_1 | O21_1 <sup>3</sup> | 89.33(9)   | C10_1              | C9_1  | C13_1              | 120.9(3)  |
| O5_1 <sup>3</sup>  | Zn2_1 | O21_1 <sup>2</sup> | 89.33(9)   | C11_1              | C10_1 | C9_1               | 120.4(3)  |
| O5_1 <sup>3</sup>  | Zn2_1 | O21_1 <sup>3</sup> | 90.67(9)   | C10_1              | C11_1 | C6_1               | 120.4(3)  |
| O5_1 <sup>2</sup>  | Zn2_1 | O21_1 <sup>2</sup> | 90.67(9)   | O12_1              | C13_1 | O14_1              | 125.5(3)  |
| O12_1 <sup>4</sup> | Zn2_1 | O5_1 <sup>3</sup>  | 85.72(10)  | O12_1              | C13_1 | C9_1               | 118.0(3)  |
| O12_1 <sup>4</sup> | Zn2_1 | O5_1 <sup>2</sup>  | 94.28(10)  | O14_1              | C13_1 | C9_1               | 116.5(3)  |
| O12_1              | Zn2_1 | O5_1 <sup>2</sup>  | 85.72(10)  | O15_1              | C16_1 | C18_1              | 116.8(4)  |
| O12_1              | Zn2_1 | O5_1 <sup>3</sup>  | 94.28(10)  | O17_1              | C16_1 | O15_1              | 122.6(4)  |
| O12_1              | Zn2_1 | O12_1 <sup>4</sup> | 180.0      | O17_1              | C16_1 | C18_1              | 120.7(5)  |
| O12_1 <sup>4</sup> | Zn2_1 | O21_1 <sup>3</sup> | 89.34(8)   | C19_1              | C18_1 | C16_1              | 120.5(5)  |
| O12_1              | Zn2_1 | O21_1 <sup>3</sup> | 90.66(8)   | C20_1 <sup>6</sup> | C18_1 | C16_1              | 121.1(5)  |
| O12_1 <sup>4</sup> | Zn2_1 | O21_1 <sup>2</sup> | 90.66(8)   | C20_1 <sup>6</sup> | C18_1 | C19_1              | 118.4(4)  |
| O12_1              | Zn2_1 | O21_1 <sup>2</sup> | 89.34(8)   | C18_1              | C19_1 | C20_1              | 120.6(6)  |
| O21_1 <sup>3</sup> | Zn2_1 | O21_1 <sup>2</sup> | 180.00(12) | C18_1 <sup>6</sup> | C20_1 | C19_1              | 121.0(5)  |
| C4_1               | O3_1  | Zn1_1              | 123.9(2)   | O21_1              | C22_1 | C24_1              | 116.4(3)  |
| C4_1               | O5_1  | Zn2_1 <sup>5</sup> | 135.7(2)   | O23_1              | C22_1 | O21_1              | 122.0(3)  |
| C13_1              | O12_1 | Zn2_1              | 136.7(2)   | O23_1              | C22_1 | C24_1              | 121.6(3)  |
| C13_1              | O14_1 | Zn1_1 <sup>3</sup> | 118.3(2)   | C25_1              | C24_1 | C22_1              | 121.5(3)  |
| C16_1              | O15_1 | Zn1_1              | 110.6(3)   | C25_1              | C24_1 | C26_1 <sup>7</sup> | 119.5(3)  |
| Zn1_1              | O21_1 | Zn2_1 <sup>5</sup> | 100.94(9)  | C26_1 <sup>7</sup> | C24_1 | C22_1              | 119.0(3)  |
| C22_1              | O21_1 | Zn1_1              | 107.5(2)   | C26_1              | C25_1 | C24_1              | 120.8(3)  |
| C22_1              | O21_1 | Zn2_1 <sup>5</sup> | 123.3(2)   | C25_1              | C26_1 | C24_1 <sup>7</sup> | 119.8(3)  |
| O3_1               | C4_1  | C6_1               | 116.5(3)   | C3_2               | N1_2  | C2_2               | 108.2(11) |
| O5_1               | C4_1  | O3_1               | 126.9(3)   | C3_3               | N1_3  | C2_3               | 115(3)    |
| O5_1               | C4_1  | C6_1               | 116.7(3)   | C2_4               | N1_4  | C3_4               | 114(3)    |

<sup>1</sup>+X,2-Y,1/2+Z; <sup>2</sup>3/2-X,1/2+Y,3/2-Z; <sup>3</sup>+X,2-Y,-1/2+Z; <sup>4</sup>3/2-X,5/2-Y,1-Z; <sup>5</sup>3/2-X,-1/2+Y,3/2-Z; <sup>6</sup>1-X,1-Y,2-Z; <sup>7</sup>3/2-X,1/2-Y,2-Z

**Table S4. Torsion Angles [°] for (DMA)<sub>2</sub>[Zn<sub>3</sub>(BDC)<sub>4</sub>·1.5H<sub>2</sub>O] at 298 K.**

| A                  | B     | C     | D                  | Angle/°   | A                  | B     | C     | D                  | Angle/°   |
|--------------------|-------|-------|--------------------|-----------|--------------------|-------|-------|--------------------|-----------|
| Zn1_1              | O3_1  | C4_1  | O5_1               | -10.5(5)  | O21_1              | C22_1 | C24_1 | C26_1 <sup>4</sup> | -175.3(3) |
| Zn1_1              | O3_1  | C4_1  | C6_1               | 168.6(2)  | O23_1              | C22_1 | C24_1 | C25_1              | -170.9(4) |
| Zn1_1 <sup>1</sup> | O14_1 | C13_1 | O12_1              | -5.8(5)   | O23_1              | C22_1 | C24_1 | C26_1 <sup>4</sup> | 7.4(5)    |
| Zn1_1 <sup>1</sup> | O14_1 | C13_1 | C9_1               | 174.4(2)  | C4_1               | C6_1  | C7_1  | C8_1               | 179.4(4)  |
| Zn1_1              | O15_1 | C16_1 | O17_1              | -6.3(7)   | C4_1               | C6_1  | C11_1 | C10_1              | -179.0(4) |
| Zn1_1              | O15_1 | C16_1 | C18_1              | 174.9(4)  | C6_1               | C7_1  | C8_1  | C9_1               | -0.2(7)   |
| Zn1_1              | O21_1 | C22_1 | O23_1              | 15.4(4)   | C7_1               | C6_1  | C11_1 | C10_1              | 0.0(7)    |
| Zn1_1              | O21_1 | C22_1 | C24_1              | -161.9(2) | C7_1               | C8_1  | C9_1  | C10_1              | -0.4(6)   |
| Zn2_1 <sup>2</sup> | O5_1  | C4_1  | O3_1               | -15.0(6)  | C7_1               | C8_1  | C9_1  | C13_1              | 179.1(4)  |
| Zn2_1 <sup>2</sup> | O5_1  | C4_1  | C6_1               | 165.9(2)  | C8_1               | C9_1  | C10_1 | C11_1              | 0.8(7)    |
| Zn2_1              | O12_1 | C13_1 | O14_1              | 45.7(5)   | C8_1               | C9_1  | C13_1 | O12_1              | 10.3(5)   |
| Zn2_1              | O12_1 | C13_1 | C9_1               | -134.4(3) | C8_1               | C9_1  | C13_1 | O14_1              | -169.8(4) |
| Zn2_1 <sup>2</sup> | O21_1 | C22_1 | O23_1              | -101.0(4) | C9_1               | C10_1 | C11_1 | C6_1               | -0.7(8)   |
| Zn2_1 <sup>2</sup> | O21_1 | C22_1 | C24_1              | 81.7(3)   | C10_1              | C9_1  | C13_1 | O12_1              | -170.1(4) |
| O3_1               | C4_1  | C6_1  | C7_1               | -171.3(4) | C10_1              | C9_1  | C13_1 | O14_1              | 9.8(5)    |
| O3_1               | C4_1  | C6_1  | C11_1              | 7.8(5)    | C11_1              | C6_1  | C7_1  | C8_1               | 0.4(6)    |
| O5_1               | C4_1  | C6_1  | C7_1               | 7.9(5)    | C13_1              | C9_1  | C10_1 | C11_1              | -178.7(4) |
| O5_1               | C4_1  | C6_1  | C11_1              | -173.0(4) | C16_1              | C18_1 | C19_1 | C20_1              | 178.2(7)  |
| O15_1              | C16_1 | C18_1 | C19_1              | 178.5(6)  | C18_1              | C19_1 | C20_1 | C18_1 <sup>3</sup> | 0.4(14)   |
| O15_1              | C16_1 | C18_1 | C20_1 <sup>3</sup> | -2.9(9)   | C20_1 <sup>3</sup> | C18_1 | C19_1 | C20_1              | -0.4(14)  |
| O17_1              | C16_1 | C18_1 | C19_1              | -0.4(10)  | C22_1              | C24_1 | C25_1 | C26_1              | 178.2(3)  |
| O17_1              | C16_1 | C18_1 | C20_1 <sup>3</sup> | 178.2(7)  | C24_1              | C25_1 | C26_1 | C24_1 <sup>4</sup> | 0.1(6)    |
| O21_1              | C22_1 | C24_1 | C25_1              | 6.5(5)    | C26_1 <sup>4</sup> | C24_1 | C25_1 | C26_1              | -0.1(6)   |

<sup>1</sup>+X,2-Y,-1/2+Z; <sup>2</sup>3/2-X,-1/2+Y,3/2-Z; <sup>3</sup>1-X,1-Y,2-Z; <sup>4</sup>3/2-X,1/2-Y,2-Z

**Table S5. Crystal data and structure refinement of Zn<sub>3</sub>(BDC)<sub>3</sub>(H<sub>2</sub>O)<sub>2</sub>·4(DMF) at 298 K.**

| Item                                                  | Value                                                                          |
|-------------------------------------------------------|--------------------------------------------------------------------------------|
| Identification code                                   | Zn <sub>3</sub> (BDC) <sub>3</sub> (H <sub>2</sub> O) <sub>2</sub> ·4(DMF)     |
| Empirical formula                                     | C <sub>36</sub> H <sub>44</sub> N <sub>4</sub> O <sub>18</sub> Zn <sub>3</sub> |
| Formula weight                                        | 1016.86                                                                        |
| Temperature / K                                       | 298                                                                            |
| Crystal system                                        | Monoclinic                                                                     |
| Space group                                           | <i>P</i> 2 <sub>1</sub> / <i>c</i>                                             |
| <i>a</i> / Å                                          | 13.0506(6)                                                                     |
| <i>b</i> / Å                                          | 9.6677(4)                                                                      |
| <i>c</i> / Å                                          | 18.4447(8)                                                                     |
| $\alpha$ / °                                          | 90                                                                             |
| $\beta$ / °                                           | 106.761(2)                                                                     |
| $\gamma$ / °                                          | 90                                                                             |
| Volume / Å <sup>3</sup>                               | 2228.29(17)                                                                    |
| <i>Z</i>                                              | 2                                                                              |
| $\rho_{\text{calc}}$ / g·cm <sup>-3</sup>             | 1.516                                                                          |
| $\mu$ / mm <sup>-1</sup>                              | 2.540                                                                          |
| F(000)                                                | 1044                                                                           |
| Crystal size / mm <sup>3</sup>                        | 0.20 × 0.16 × 0.02                                                             |
| Radiation                                             | Cu K $\alpha$ ( $\lambda$ = 1.54178 Å)                                         |
| $\theta$ range for data collection / °                | 3.537–70.186                                                                   |
| Index ranges                                          | –15 ≤ <i>h</i> ≤ 15, 0 ≤ <i>k</i> ≤ 11, 0 ≤ <i>l</i> ≤ 22                      |
| Reflections collected                                 | 4233                                                                           |
| Independent reflections                               | 4233 (R <sub>int</sub> = 0.0664)                                               |
| Completeness to $\theta$ = 67.679°                    | 100%                                                                           |
| Refinement method                                     | Full-matrix least-squares on F <sup>2</sup>                                    |
| Data / restraints / parameters                        | 4233 / 3 / 288                                                                 |
| Goodness-of-fit on F <sup>2</sup>                     | 1.030                                                                          |
| Final R indices [ <i>I</i> > 2 $\sigma$ ( <i>I</i> )] | R1 = 0.0398, wR2 = 0.1065                                                      |
| Final R indices [all data]                            | R1 = 0.0433, wR2 = 0.1101                                                      |
| Largest diff. peak/ hole/e·Å <sup>-3</sup>            | 0.574 / –0.589                                                                 |

$$R = \frac{\sum ||F_o| - |F_c||}{\sum |F_o|}, wR = \frac{\{\sum [w(|F_o|^2 - |F_c|^2)^2]\}^{1/2}}{\sum [w(|F_o|^4)]^{1/2}} \text{ and } w = 1/[\sigma^2(F_o^2) + (0.0655P)^2 + 1.6206P] \text{ where } P = (F_o^2 + 2F_c^2)/3$$

**Table S6. Atomic coordinates ( $\times 10^4$ ) and equivalent isotropic displacement parameters ( $\text{\AA}^2 \times 10^3$ ) for  $\text{Zn}_3(\text{BDC})_3(\text{H}_2\text{O})_2 \cdot 4(\text{DMF})$  at 298 K with estimated standard deviations in parentheses.**

| Label  | x        | y        | z        | Occupancy | $U_{\text{eq}}^*$ |
|--------|----------|----------|----------|-----------|-------------------|
| Zn(1)  | 10000    | 10000    | 10000    | 1         | 32(1)             |
| Zn(2)  | 7423(1)  | 4561(1)  | 4519(1)  | 1         | 33(1)             |
| O(1A)  | 9157(2)  | 8639(2)  | 9210(2)  | 1         | 43(1)             |
| O(2A)  | 7472(2)  | 9281(3)  | 8653(2)  | 1         | 47(1)             |
| C(3A)  | 8327(2)  | 8666(3)  | 8662(2)  | 1         | 37(1)             |
| O(4A)  | 7522(2)  | 5607(3)  | 5434(2)  | 1         | 47(1)             |
| O(5A)  | 9310(2)  | 5620(3)  | 5828(2)  | 1         | 47(1)             |
| C(6A)  | 8415(2)  | 5888(3)  | 5904(2)  | 1         | 39(1)             |
| C(7A)  | 8340(2)  | 7911(3)  | 7955(2)  | 1         | 40(1)             |
| C(8A)  | 7420(3)  | 7827(4)  | 7352(2)  | 1         | 50(1)             |
| H(8A)  | 6784.7   | 8210.65  | 7392.42  | 1         | 59                |
| C(9A)  | 7443(3)  | 7170(4)  | 6687(2)  | 1         | 49(1)             |
| H(9A)  | 6823.68  | 7115.38  | 6283.02  | 1         | 59                |
| C(10A) | 8381(2)  | 6598(3)  | 6624(2)  | 1         | 41(1)             |
| C(11A) | 9303(3)  | 6665(4)  | 7233(2)  | 1         | 54(1)             |
| H(11A) | 9935.51  | 6271.43  | 7195.53  | 1         | 65                |
| C(12A) | 9277(3)  | 7317(4)  | 7893(2)  | 1         | 51(1)             |
| H(12A) | 9894.75  | 7358.42  | 8299.54  | 1         | 61                |
| O(1B)  | 7793(2)  | 2212(3)  | 5173(2)  | 1         | 66(1)             |
| O(2B)  | 8741(2)  | 3430(2)  | 4591(2)  | 1         | 40(1)             |
| C(3B)  | 8569(2)  | 2309(3)  | 4927(2)  | 1         | 42(1)             |
| C(4B)  | 9321(2)  | 1125(3)  | 4966(2)  | 1         | 39(1)             |
| C(5B)  | 10042(3) | 1122(3)  | 4547(2)  | 1         | 46(1)             |
| H(5B)  | 10076.13 | 1879.29  | 4243.72  | 1         | 55                |
| C(6B)  | 10715(3) | 8(3)     | 4573(2)  | 1         | 46(1)             |
| H(6B)  | 11192.54 | 12.66    | 4283.33  | 1         | 56                |
| O(1C)  | 5970(2)  | 3885(3)  | 4094(2)  | 1         | 62(1)             |
| H(1CA) | 5690(40) | 3360(50) | 4360(20) | 1         | 92                |
| H(1CB) | 5450(30) | 4400(50) | 3790(20) | 1         | 92                |
| O(1D)  | 4947(3)  | 2359(6)  | 4817(3)  | 1         | 127(2)            |
| C(2D)  | 5341(5)  | 1655(6)  | 5357(4)  | 1         | 95(2)             |
| H(2D)  | 6066.56  | 1453.28  | 5471.14  | 1         | 115               |
| N(3D)  | 4786(4)  | 1134(5)  | 5812(3)  | 1         | 99(2)             |

|        |         |          |         |   |        |
|--------|---------|----------|---------|---|--------|
| C(4D)  | 5352(8) | 300(9)   | 6436(5) | 1 | 146(3) |
| H(4DA) | 5191.1  | 605.6    | 6886.3  | 1 | 218    |
| H(4DB) | 6107.06 | 381.13   | 6504.47 | 1 | 218    |
| H(4DC) | 5138.83 | -648.28  | 6337.86 | 1 | 218    |
| C(5D)  | 3712(6) | 1402(10) | 5674(6) | 1 | 161(4) |
| H(5DA) | 3594.78 | 1881.33  | 6098.52 | 1 | 242    |
| H(5DB) | 3322.19 | 545.86   | 5597.58 | 1 | 242    |
| H(5DC) | 3468.58 | 1964.9   | 5228.28 | 1 | 242    |
| O(1E)  | 4533(3) | 5376(5)  | 3104(2) | 1 | 102(2) |
| C(2E)  | 3765(4) | 5872(5)  | 3263(3) | 1 | 73(2)  |
| H(2E)  | 3739.43 | 5775.04  | 3759.41 | 1 | 88     |
| N(3E)  | 2976(3) | 6527(5)  | 2789(2) | 1 | 85(2)  |
| C(4E)  | 2073(5) | 7043(7)  | 2992(4) | 1 | 111(2) |
| H(4EA) | 1439.82 | 6566.14  | 2706.17 | 1 | 167    |
| H(4EB) | 1994.7  | 8015.36  | 2883.16 | 1 | 167    |
| H(4EC) | 2175.18 | 6896.18  | 3522.74 | 1 | 167    |
| C(5E)  | 2973(8) | 6710(13) | 2022(4) | 1 | 200(6) |
| H(5EA) | 3653.65 | 7064.61  | 2008.19 | 1 | 301    |
| H(5EB) | 2419.33 | 7351.51  | 1777.92 | 1 | 301    |
| H(5EC) | 2842.32 | 5836.92  | 1764.05 | 1 | 301    |

\* $U_{eq}$  is defined as one third of the trace of the orthogonalized  $U_{ij}$  tensor.

**Table S7. Anisotropic displacement parameters ( $\text{\AA}^2 \times 10^3$ ) for  $\text{Zn}_3(\text{BDC})_3(\text{H}_2\text{O})_2 \cdot 4(\text{DMF})$  at 298 K with estimated standard deviations in parentheses.**

| Label  | U <sub>11</sub> | U <sub>22</sub> | U <sub>33</sub> | U <sub>12</sub> | U <sub>13</sub> | U <sub>23</sub> |
|--------|-----------------|-----------------|-----------------|-----------------|-----------------|-----------------|
| Zn(1)  | 39(1)           | 30(1)           | 27(1)           | -6(1)           | 11(1)           | -2(1)           |
| Zn(2)  | 40(1)           | 30(1)           | 30(1)           | 2(1)            | 11(1)           | 1(1)            |
| O(1A)  | 52(2)           | 36(2)           | 37(2)           | -3(1)           | 6(1)            | -10(1)          |
| O(2A)  | 48(2)           | 54(2)           | 40(2)           | -1(1)           | 14(1)           | -19(1)          |
| C(3A)  | 46(2)           | 32(2)           | 32(2)           | -8(2)           | 13(2)           | -6(2)           |
| O(4A)  | 50(2)           | 53(2)           | 37(2)           | 4(1)            | 13(1)           | -14(1)          |
| O(5A)  | 54(2)           | 55(2)           | 37(2)           | 3(1)            | 20(1)           | -9(1)           |
| C(6A)  | 51(2)           | 36(2)           | 34(2)           | 4(2)            | 16(2)           | 1(2)            |
| C(7A)  | 46(2)           | 40(2)           | 33(2)           | -2(2)           | 13(2)           | -7(2)           |
| C(8A)  | 46(2)           | 62(2)           | 41(2)           | 5(2)            | 12(2)           | -16(2)          |
| C(9A)  | 48(2)           | 61(2)           | 36(2)           | 6(2)            | 8(2)            | -14(2)          |
| C(10A) | 49(2)           | 42(2)           | 34(2)           | -1(2)           | 14(2)           | -7(2)           |
| C(11A) | 46(2)           | 70(2)           | 47(2)           | 7(2)            | 15(2)           | -14(2)          |
| C(12A) | 46(2)           | 65(2)           | 38(2)           | 3(2)            | 7(2)            | -16(2)          |
| O(1B)  | 63(2)           | 45(2)           | 103(2)          | 13(2)           | 44(2)           | 12(2)           |
| O(2B)  | 49(2)           | 26(1)           | 43(2)           | 5(1)            | 8(1)            | 0(1)            |
| C(3B)  | 47(2)           | 31(2)           | 47(2)           | 2(2)            | 11(2)           | -2(2)           |
| C(4B)  | 45(2)           | 25(2)           | 47(2)           | 2(1)            | 11(2)           | -1(2)           |
| C(5B)  | 59(2)           | 28(2)           | 56(2)           | 4(2)            | 23(2)           | 5(2)            |
| C(6B)  | 59(2)           | 33(2)           | 55(2)           | 5(2)            | 29(2)           | 2(2)            |
| O(1C)  | 46(2)           | 63(2)           | 69(2)           | -10(2)          | 6(2)            | 15(2)           |
| O(1D)  | 89(3)           | 143(4)          | 146(4)          | -18(3)          | 26(3)           | 71(3)           |
| C(2D)  | 88(3)           | 94(4)           | 105(4)          | -6(3)           | 31(3)           | 14(4)           |
| N(3D)  | 121(4)          | 81(3)           | 110(4)          | 19(3)           | 55(3)           | 30(3)           |
| C(4D)  | 182(9)          | 128(6)          | 118(6)          | 17(6)           | 28(6)           | 46(5)           |
| C(5D)  | 145(6)          | 153(7)          | 222(10)         | 53(6)           | 109(7)          | 73(8)           |
| O(1E)  | 69(2)           | 129(3)          | 102(3)          | 27(2)           | 18(2)           | 39(3)           |
| C(2E)  | 70(3)           | 77(3)           | 68(3)           | -1(2)           | 12(2)           | 17(2)           |
| N(3E)  | 76(2)           | 109(3)          | 70(2)           | 29(2)           | 23(2)           | 28(2)           |
| C(4E)  | 103(4)          | 110(5)          | 131(5)          | 35(4)           | 49(4)           | 24(4)           |
| C(5E)  | 184(8)          | 343(16)         | 87(5)           | 151(10)         | 61(5)           | 99(7)           |

The anisotropic displacement factor exponent takes the form:  $-2\pi^2[h^2a^{*2}U_{11} + \dots + 2hka^*b^*U_{12}]$ .

**Table S8. Bond lengths [Å] for Zn<sub>3</sub>(BDC)<sub>3</sub>(H<sub>2</sub>O)<sub>2</sub>·4(DMF) at 298 K with estimated standard deviations in parentheses.**

| Label         | Distances |
|---------------|-----------|
| Zn(1)-O(1A)#1 | 2.035(2)  |
| Zn(1)-O(1A)   | 2.035(2)  |
| Zn(1)-O(5A)#2 | 2.072(2)  |
| Zn(1)-O(5A)#3 | 2.072(2)  |
| Zn(1)-O(2B)#2 | 2.204(2)  |
| Zn(1)-O(2B)#3 | 2.204(2)  |
| Zn(2)-O(2A)#4 | 1.967(2)  |
| Zn(2)-O(4A)   | 1.940(2)  |
| Zn(2)-O(2B)   | 2.009(2)  |
| Zn(2)-O(1C)   | 1.944(2)  |
| O(1A)-C(3A)   | 1.250(4)  |
| O(2A)-C(3A)   | 1.261(4)  |
| C(3A)-C(7A)   | 1.499(4)  |
| O(4A)-C(6A)   | 1.265(4)  |
| O(5A)-C(6A)   | 1.243(4)  |
| C(6A)-C(10A)  | 1.507(4)  |
| C(7A)-C(8A)   | 1.383(4)  |
| C(7A)-C(12A)  | 1.386(4)  |
| C(8A)-H(8A)   | 0.9300    |
| C(8A)-C(9A)   | 1.390(4)  |
| C(9A)-H(9A)   | 0.9300    |
| C(9A)-C(10A)  | 1.378(4)  |
| C(10A)-C(11A) | 1.391(4)  |
| C(11A)-H(11A) | 0.9300    |
| C(11A)-C(12A) | 1.379(5)  |
| C(12A)-H(12A) | 0.9300    |
| O(1B)-C(3B)   | 1.226(4)  |
| O(2B)-C(3B)   | 1.299(4)  |
| C(3B)-C(4B)   | 1.497(4)  |
| C(4B)-C(5B)   | 1.379(5)  |
| C(4B)-C(6B)#5 | 1.395(4)  |
| C(5B)-H(5B)   | 0.9300    |
| C(5B)-C(6B)   | 1.382(4)  |
| C(6B)-H(6B)   | 0.9300    |

|              |           |
|--------------|-----------|
| O(1C)-H(1CA) | 0.861(19) |
| O(1C)-H(1CB) | 0.899(19) |
| O(1D)-C(2D)  | 1.193(7)  |
| C(2D)-H(2D)  | 0.9300    |
| C(2D)-N(3D)  | 1.354(7)  |
| N(3D)-C(4D)  | 1.425(8)  |
| N(3D)-C(5D)  | 1.375(8)  |
| C(4D)-H(4DA) | 0.9600    |
| C(4D)-H(4DB) | 0.9600    |
| C(4D)-H(4DC) | 0.9600    |
| C(5D)-H(5DA) | 0.9600    |

Symmetry transformations used to generate equivalent atoms:

(1)  $-x+2, -y+2, -z+2$  (2)  $x, -y+3/2, z+1/2$  (3)  $-x+2, y+1/2, -z+3/2$  (4)  $x, -y+3/2, z-1/2$  (5)  $-x+2, -y, -z+1$  (6)  $-x+2, y-1/2, -z+3/2$

**Table S9. Bond angles [°] for Zn<sub>3</sub>(BDC)<sub>3</sub>(H<sub>2</sub>O)<sub>2</sub>·4(DMF) at 298 K with estimated standard deviations in parentheses.**

| Label                 | Angles     |
|-----------------------|------------|
| O(1A)#1-Zn(1)-O(1A)   | 180.0      |
| O(1A)-Zn(1)-O(5A)#2   | 94.63(10)  |
| O(1A)-Zn(1)-O(5A)#3   | 85.37(10)  |
| O(1A)#1-Zn(1)-O(5A)#2 | 85.37(10)  |
| O(1A)#1-Zn(1)-O(5A)#3 | 94.63(10)  |
| O(1A)#1-Zn(1)-O(2B)#2 | 89.75(8)   |
| O(1A)#1-Zn(1)-O(2B)#3 | 90.25(8)   |
| O(1A)-Zn(1)-O(2B)#2   | 90.25(8)   |
| O(1A)-Zn(1)-O(2B)#3   | 89.75(8)   |
| O(5A)#2-Zn(1)-O(5A)#3 | 180.0      |
| O(5A)#2-Zn(1)-O(2B)#2 | 90.67(9)   |
| O(5A)#3-Zn(1)-O(2B)#2 | 89.33(9)   |
| O(5A)#2-Zn(1)-O(2B)#3 | 89.33(9)   |
| O(5A)#3-Zn(1)-O(2B)#3 | 90.67(9)   |
| O(2B)#2-Zn(1)-O(2B)#3 | 180.0      |
| O(2A)#4-Zn(2)-O(2B)   | 97.79(9)   |
| O(4A)-Zn(2)-O(2A)#4   | 113.59(10) |
| O(4A)-Zn(2)-O(2B)     | 112.65(9)  |
| O(4A)-Zn(2)-O(1C)     | 109.79(12) |
| O(1C)-Zn(2)-O(2A)#4   | 96.91(11)  |
| O(1C)-Zn(2)-O(2B)     | 124.08(11) |
| C(3A)-O(1A)-Zn(1)     | 136.8(2)   |
| C(3A)-O(2A)-Zn(2)#2   | 119.62(19) |
| O(1A)-C(3A)-O(2A)     | 125.3(3)   |
| O(1A)-C(3A)-C(7A)     | 118.0(3)   |
| O(2A)-C(3A)-C(7A)     | 116.8(3)   |
| C(6A)-O(4A)-Zn(2)     | 121.6(2)   |
| C(6A)-O(5A)-Zn(1)#6   | 139.9(2)   |
| O(4A)-C(6A)-C(10A)    | 116.4(3)   |
| O(5A)-C(6A)-O(4A)     | 126.0(3)   |
| O(5A)-C(6A)-C(10A)    | 117.5(3)   |
| C(8A)-C(7A)-C(3A)     | 120.2(3)   |
| C(8A)-C(7A)-C(12A)    | 119.5(3)   |
| C(12A)-C(7A)-C(3A)    | 120.3(3)   |

|                      |            |
|----------------------|------------|
| C(7A)-C(8A)-H(8A)    | 120.0      |
| C(7A)-C(8A)-C(9A)    | 120.0(3)   |
| C(9A)-C(8A)-H(8A)    | 120.0      |
| C(8A)-C(9A)-H(9A)    | 119.8      |
| C(10A)-C(9A)-C(8A)   | 120.3(3)   |
| C(10A)-C(9A)-H(9A)   | 119.8      |
| C(9A)-C(10A)-C(6A)   | 120.7(3)   |
| C(9A)-C(10A)-C(11A)  | 119.6(3)   |
| C(11A)-C(10A)-C(6A)  | 119.7(3)   |
| C(10A)-C(11A)-H(11A) | 120.0      |
| C(12A)-C(11A)-C(10A) | 120.0(3)   |
| C(12A)-C(11A)-H(11A) | 120.0      |
| C(7A)-C(12A)-H(12A)  | 119.7      |
| C(11A)-C(12A)-C(7A)  | 120.6(3)   |
| C(11A)-C(12A)-H(12A) | 119.7      |
| Zn(2)-O(2B)-Zn(1)#6  | 100.82(8)  |
| C(3B)-O(2B)-Zn(1)#6  | 128.72(19) |
| C(3B)-O(2B)-Zn(2)    | 102.90(18) |
| O(1B)-C(3B)-O(2B)    | 121.0(3)   |
| O(1B)-C(3B)-C(4B)    | 121.6(3)   |
| O(2B)-C(3B)-C(4B)    | 117.4(3)   |
| C(5B)-C(4B)-C(3B)    | 121.2(3)   |
| C(5B)-C(4B)-C(6B)#5  | 119.3(3)   |
| C(6B)#5-C(4B)-C(3B)  | 119.5(3)   |
| C(4B)-C(5B)-H(5B)    | 119.6      |
| C(4B)-C(5B)-C(6B)    | 120.8(3)   |
| C(6B)-C(5B)-H(5B)    | 119.6      |
| C(4B)#5-C(6B)-H(6B)  | 120.0      |
| C(5B)-C(6B)-C(4B)#5  | 120.0(3)   |
| C(5B)-C(6B)-H(6B)    | 120.0      |
| Zn(2)-O(1C)-H(1CA)   | 120(3)     |
| Zn(2)-O(1C)-H(1CB)   | 123(3)     |
| H(1CA)-O(1C)-H(1CB)  | 108(4)     |

Symmetry transformations used to generate equivalent atoms:

(1)  $-x+2, -y+2, -z+2$  (2)  $x, -y+3/2, z+1/2$  (3)  $-x+2, y+1/2, -z+3/2$  (4)  $x, -y+3/2, z-1/2$  (5)  $-x+2, -y, -z+1$  (6)  $-x+2, y-1/2, -z+3/2$

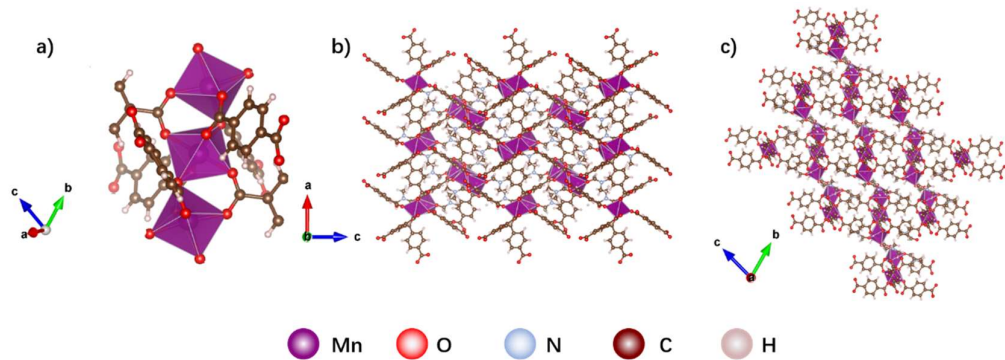

**Figure S1. Crystal structures of 2D-Mn-MOFs tested in this study:** (A) The inorganic part of the material and projection of the crystal structure along (B) b-axis and (C) a-axis.

## Section II – Additional AFM Data and Analysis

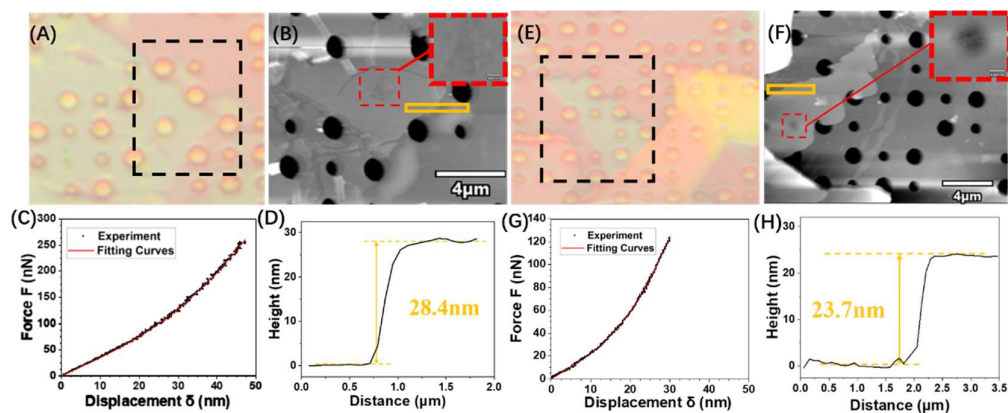

**Figure S2. Representative Optical microscopy and AFM characterization of suspended 2D  $\text{Zn}_3(\text{BDC})_3(\text{H}_2\text{O})_2 \cdot 4(\text{DMF})$  (A-D) and 3D  $(\text{DMA})_2[\text{Zn}_3(\text{BDC})_4 \cdot 1.5\text{H}_2\text{O}]$  (E-H) MOF membranes.** (A, E) Optical images of the suspended regions; (B, F) corresponding AFM topography showing suspended membranes across micropores. (C, G) Representative force-displacement curves (black dots) and fitting results (red lines). (D, H) Height profiles of the nanosheets measured along the yellow lines in (B, F).

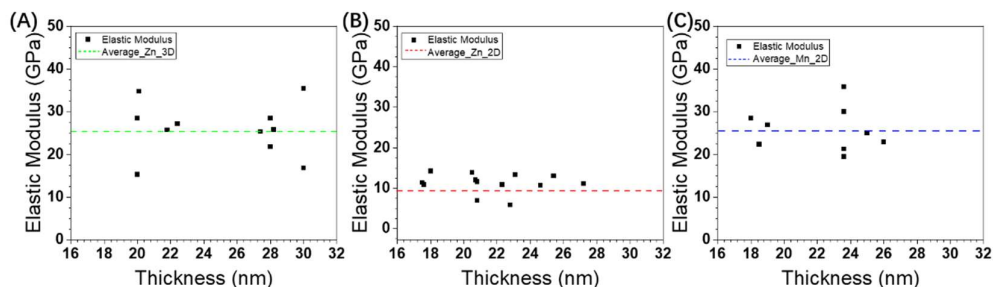

**Figure S3. Thickness-independent in-plane elastic modulus  $E_{\parallel}$  of Zn- and Mn-based MOFs.** (A) 3D  $(\text{DMA})_2[\text{Zn}_3(\text{BDC})_4 \cdot 1.5\text{H}_2\text{O}]$ , (B) 2D  $\text{Zn}_3(\text{BDC})_3(\text{H}_2\text{O})_2 \cdot 4(\text{DMF})$ , and (C) 2D  $\text{Mn}_3(\text{BDC})_3 \cdot 4(\text{DMF})$ . The dashed lines indicate the mean values of  $E_{\parallel}$  for each MOF material, showing no significant dependence on the membrane thickness.

**Table S10. Data for Figure 6 in the main text.**

| Chemical                                                                                            | $E_{\parallel}$ (GPa) | Density      | Category                             |
|-----------------------------------------------------------------------------------------------------|-----------------------|--------------|--------------------------------------|
| $\text{COF}_{\text{TAPB-DHTA}}$                                                                     | $10.38 \pm 3.42^1$    | $0.393^1$    | 2D COFs                              |
| $\text{COF}_{\text{TTA-DHTA}}$                                                                      | $25.9 \pm 0.6^2$      | $0.5^2$      |                                      |
| COF-1                                                                                               | $33^3$                | $0.41^3$     |                                      |
| $\text{COF}_{\text{TAPB-PDA}}$                                                                      | $42.98 \pm 3.03^4$    | $0.38^4$     |                                      |
| $\text{COF}_{\text{TAPB-DMTP}}$                                                                     | $47.1 \pm 2.3^4$      | $0.47^4$     |                                      |
| (2D) NUS-8                                                                                          | $1^5$                 | $1.028^5$    | 2D MOFs                              |
| $\text{Cu}_{\text{pym}2\text{S}2}$                                                                  | $5^6$                 | $1.84^6$     |                                      |
| $\text{Cu}_2 \text{NiTCPP}$                                                                         | $1.9^7$               | $1.239^7$    |                                      |
| $\text{Cu}_{\text{PdTCPP}}$                                                                         | $12^8$                | $1.1^8$      |                                      |
| $\text{Zn}_3(\text{BDC})_3(\text{H}_2\text{O})_2 \cdot 4(\text{DMF})$<br>(2D-Zn-MOF in this work)   | $11.22 \pm 2.45$      | $1.516$      |                                      |
| $\text{Mn}_3(\text{BDC})_3 \cdot 4(\text{DMF})$<br>(2D-Mn-MOF in this work)                         | $25.53 \pm 4.89$      | $1.549$      |                                      |
| $(\text{DMA})_2[\text{Zn}_3(\text{BDC})_4 \cdot 1.5\text{H}_2\text{O}]$<br>(3D-Zn-MOF in this work) | $25.92 \pm 6.3$       | $1.088$      | 3D MOF                               |
| Carbon Nanosheet (Unannealed)                                                                       | $12^9$                | $1.3^9$      | Carbon Nanosheet                     |
| Carbon Nanosheet (Annealed)                                                                         | $48^9$                | $1.6^9$      |                                      |
| $\text{Cu}_3(\text{C}_6\text{S}_6)$                                                                 | $16 \pm 2^{10}$       | $2^{10}$     | 2D organo-metallic sheet             |
| $\text{C}_{4\text{n}3\text{PbI}}$                                                                   | $5.6 \pm 0.9^{11}$    | $3.4^{11}$   | 2D HOIPs                             |
| $\text{C}_{12\text{n}1\text{PbI}}$                                                                  | $1.3^{12}$            | $2.054^{12}$ |                                      |
| $\text{C}_{4\text{n}1\text{PbCl}}$                                                                  | $10.6^{12}$           | $1.88^{12}$  |                                      |
| Black Phosphorous (BP)                                                                              | $89.7 \pm 26.4^{13}$  | $2.619^{13}$ | Other Typical 2D Inorganic Materials |
| Mica                                                                                                | $202 \pm 22^{14}$     | $2.883^{14}$ |                                      |
| $\text{MoS}_2$                                                                                      | $330 \pm 70^{15}$     | $5.06^{15}$  |                                      |
| MXene                                                                                               | $330 \pm 30^{16}$     | $3.2^{16}$   |                                      |

|          |                  |             |  |
|----------|------------------|-------------|--|
| graphene | $942 \pm 3^{17}$ | $2.27^{17}$ |  |
| hBN      | $856 \pm 3^{17}$ | $2.1^{17}$  |  |

## References

1. Fang, Q.; Sui, C.; Wang, C.; Zhai, T.; Zhang, J.; Liang, J.; Guo, H.; Sandoz-Rosado, E.; Lou, J., Strong and flaw-insensitive two-dimensional covalent organic frameworks. *Matter* **2021**, *4*(3), 1017-1028.
2. Hao, Q.; Zhao, C.; Sun, B.; Lu, C.; Liu, J.; Liu, M.; Wan, L.-J.; Wang, D., Confined synthesis of two-dimensional covalent organic framework thin films within superspreading water layer. *Journal of the American Chemical Society* **2018**, *140*(38), 12152-12158.
3. Sun, J.; Iakunkov, A.; Baburin, I. A.; Joseph, B.; Palermo, V.; Talyzin, A. V., Covalent organic framework (COF-1) under high pressure. *Angewandte Chemie International Edition* **2020**, *59*(3), 1087-1092.
4. Fang, Q.; Pang, Z.; Ai, Q.; Liu, Y.; Zhai, T.; Steinbach, D.; Gao, G.; Zhu, Y.; Li, T.; Lou, J., Superior mechanical properties of multilayer covalent-organic frameworks enabled by rationally tuning molecular interlayer interactions. *Proceedings of the National Academy of Sciences* **2023**, *120*(15), e2208676120.
5. Yuan, H.; Li, K.; Shi, D.; Yang, H.; Yu, X.; Fan, W.; Buenconsejo, P. J. S.; Zhao, D., Large-Area Fabrication of Ultrathin Metal-Organic Framework Membranes. *Advanced Materials* **2023**, *35*(18), 2211859.
6. Hermosa, C.; Horrocks, B. R.; Martínez, J. I.; Liscio, F.; Gómez-Herrero, J.; Zamora, F., Mechanical and optical properties of ultralarge flakes of a metal-organic framework with molecular thickness. *Chemical science* **2015**, *6*(4), 2553-2558.
7. Lu, J., Robust Proton Conduction against Mechanical Stress in Flexible Free-Standing Membrane Composed of Two-Dimensional Coordination Polymer. In *Novel Proton Conducting in Free-Standing Coordination Polymer Membranes*, Springer: 2024; pp 43-62.
8. Sahabudeen, H.; Zhang, Q.; Liu, Y.; Heuchel, M.; Machatschek, R., Mechanistic insights into the deformation and degradation of a 2D metal organic framework. *npj 2D Materials and Applications* **2023**, *7*(1), 25.
9. Turchanin, A.; Beyer, A.; Nottbohm, C.; Zhang, X.; Stosch, R.; Sologubenko, A.; Mayer, J.; Hinze, P.; Weimann, T.; Golzhauser, A., One nanometer thin carbon nanosheets with tunable conductivity and stiffness. *arXiv preprint arXiv:1105.5791* **2011**.
10. Zheng, Z.; Ruiz-Vargas, C. S.; Bauer, T.; Rossi, A.; Payamyar, P.; Schütz, A.; Stemmer, A.; Sakamoto, J.; Schlüter, A. D., Square -Micrometer -Sized, Free -Standing Organometallic Sheets and Their Square-Centimeter-Sized Multilayers on Solid Substrates. *Macromolecular rapid communications* **2013**, *34*(21), 1670-1680.
11. Tu, Q.; Spanopoulos, I.; Hao, S.; Wolverton, C.; Kanatzidis, M. G.; Shekhawat, G. S.; Dravid, V. P., Out-of-plane mechanical properties of 2D hybrid organic-inorganic perovskites by nanoindentation. *ACS applied materials & interfaces* **2018**, *10*(26), 22167-22173.
12. Kim, D.; Vasileiadou, E. S.; Spanopoulos, I.; Kanatzidis, M. G.; Tu, Q., In-plane mechanical properties of two-dimensional hybrid organic-inorganic perovskite nanosheets: structure-property relationships. *ACS Applied Materials & Interfaces* **2021**, *13*(27), 31642-31649.
13. Wang, J.-Y.; Li, Y.; Zhan, Z.-Y.; Li, T.; Zhen, L.; Xu, C.-Y., Elastic properties of suspended black phosphorus nanosheets. *Applied Physics Letters* **2016**, *108*(1).
14. Castellanos-Gomez, A.; Poot, M.; Amor-Amorós, A.; Steele, G. A.; van der Zant, H. S.; Agraït, N.; Rubio-Bollinger, G., Mechanical properties of freely suspended atomically thin dielectric

layers of mica. *Nano Research* **2012**, *5* (8), 550-557.

15. Castellanos-Gomez, A.; Poot, M.; Steele, G. A.; Van Der Zant, H. S.; Agrait, N.; Rubio-Bollinger, G., Elastic properties of freely suspended MoS<sub>2</sub> nanosheets. *arXiv preprint arXiv:1202.4439* **2012**.

16. Lipatov, A.; Lu, H.; Alhabeab, M.; Anasori, B.; Gruverman, A.; Gogotsi, Y.; Sinitskii, A., Elastic properties of 2D Ti<sub>3</sub>C<sub>2</sub>T<sub>x</sub> MXene monolayers and bilayers. *Science advances* **2018**, *4* (6), eaat0491.

17. Falin, A.; Cai, Q.; Santos, E. J.; Scullion, D.; Qian, D.; Zhang, R.; Yang, Z.; Huang, S.; Watanabe, K.; Taniguchi, T., Mechanical properties of atomically thin boron nitride and the role of interlayer interactions. *Nature communications* **2017**, *8* (1), 15815.
